# Supplementary material for: Non-contact monitoring of extra-cellular field potentials with a multi-electrode array
Source: Royal Society of Chemistry journal article supplement (doi:10.1039/c8lc00984h), 2019-01-01
Supplement: c8lc00984h1.pdf [file c8lc00984h1.pdf]

## Supporting information

for

# Non-contact monitoring of extra-cellular field potentials with a multi-electrode array

by Tal Sharf,\* Paul K. Hansma, Mukund A. Hari and Kenneth S. Kosik

\*talsharf@ucsb.edu

### A. Representative extra-cellular field potential waveforms from non-contact measurements

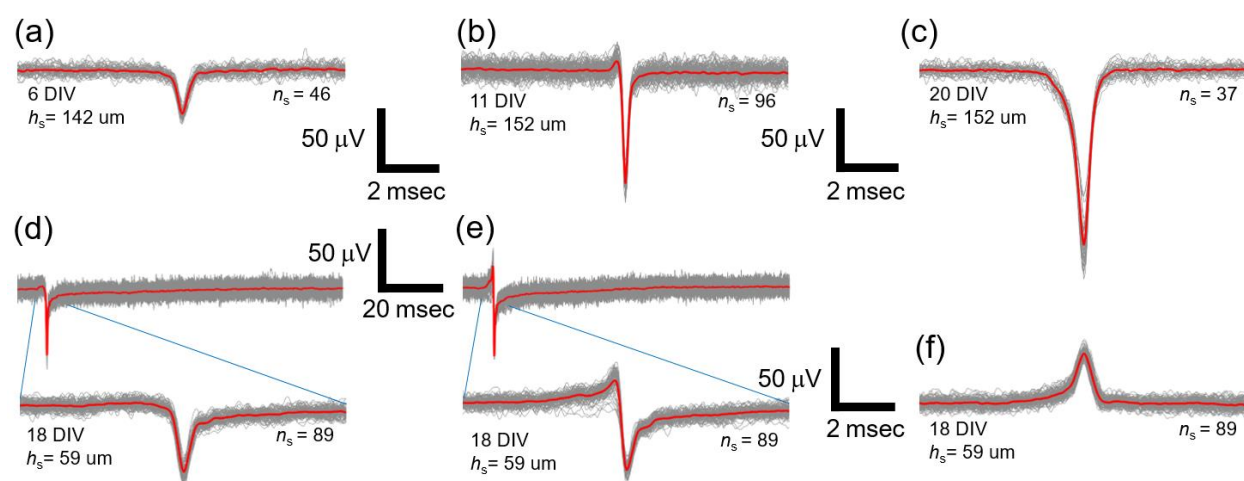

**Figure S1.** (a-f) Representative extra-cellular field potential waveforms recorded from a multi-electrode array (MEA) in the non-contact configuration from  $N = 10$  primary cardiomyocyte culture preparations grown on glass coverslips. Spike triggered averages appear as the red solid line (averaged over the number of detected spikes,  $n_s$ , above background noise levels). Individual spike waveforms are plotted in gray. A total of 135 electrodes (from  $N = 10$  preparations) registered spikes distinguishable above background noise: 30 percent of these spikes displayed only negative peaks, 44% displayed an initial positive component followed by negative peak and 26% registered only a positive component to the waveform.

**B. Representative extra-cellular field potential waveforms from cells grown on the surface of a multi-electrode array**

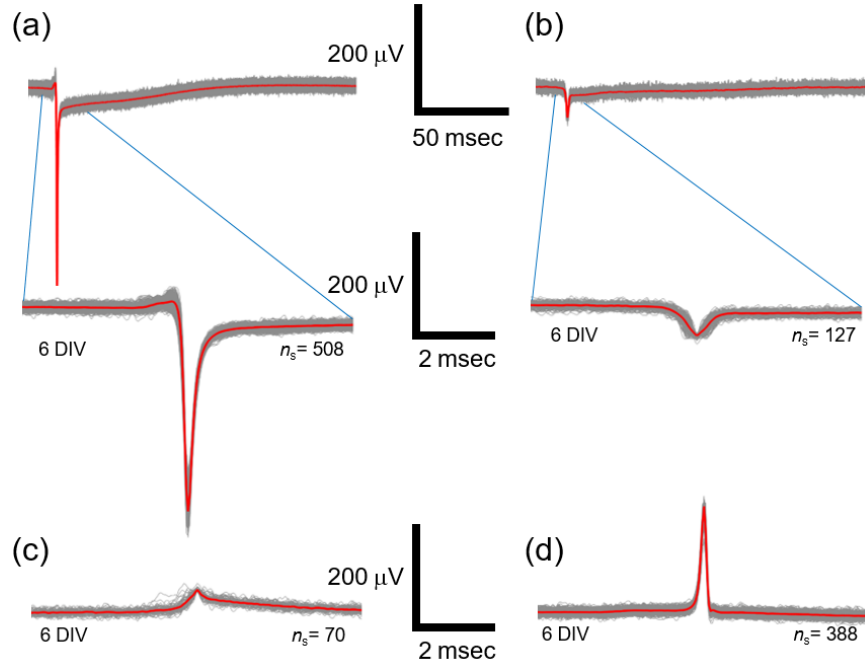

**Figure S2.** (a-d) Representative extra-cellular field potential waveforms produced by primary cardiomyocyte cells grown on the surface of a multi-electrode array (MEA).

**C. Characterization of coverslip surface approach**

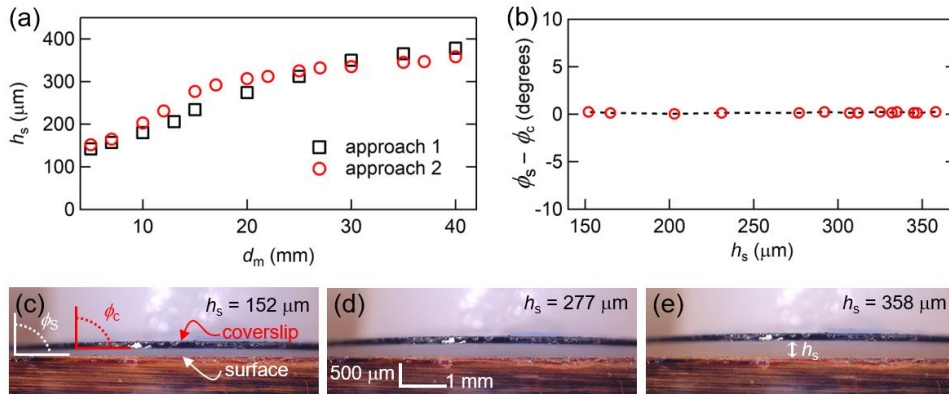

**Figure S3.** (a) Separate measurements of the coverslip surface height  $h_s$  as a function of magnet-magnet separation distance  $d_m$ . (b) The relative angular variation between the surface  $\phi_s$  and the coverslip  $\phi_c$  is plotted for fixed coverslip surface heights  $h_s$  during approach. The mean angular variation is  $0.17^\circ \pm 0.06^\circ$  measured over a distance of 2 mm. The variation in  $h_s$  due to angular variability during approach is  $\approx 3 \mu\text{m}$  across the 1.1 mm distance of the recording surface of the multi-electrode array. (c-e) Optical images of the relative coverslip surface height  $h_s$  during approach.

## D. Microscopy of primary cardiomyocyte cultures

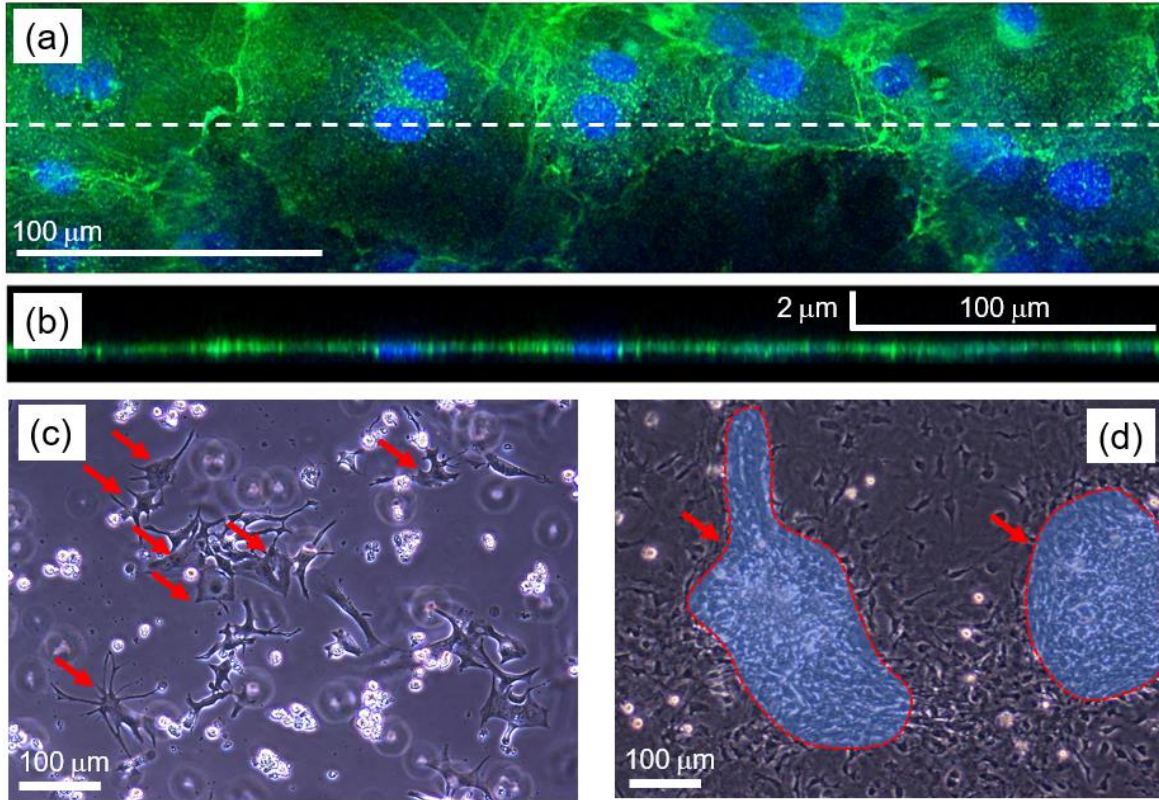

**Figure S4.** (a) Immunofluorescence images taken of primary cardiomyocyte cultures at 10 *days in vitro* taken with a Leica SP8 resonant scanning confocal microscope using a 63x oil immersion objective. The cell membrane shown in green (WGA-AF488) and nuclei shown in blue (DAPI). The scale bar is 100  $\mu\text{m}$ . (b) Z-stack image taken along the dotted line of (a). The vertical and horizontal scale bars are 2  $\mu\text{m}$  and 100  $\mu\text{m}$ , respectively. (c) Phase contrast images of primary cardiomyocytes cultures taken at 5 *days in vitro*. The red arrows indicate spontaneously contracting cells. The scale bar is 100  $\mu\text{m}$ . (d) Phase contrast images of primary cultures taken at 14 *days in vitro*. The red arrows point to spontaneously contracting, multi-cellular populations and highlighted by the dashed line. The scale bar is 100  $\mu\text{m}$ .

## E. Modeling extra-cellular field potentials

The extra-cellular voltage produced by an action potential has been previously shown by Gold *et al.*<sup>1</sup> to be well modeled as an isotropic volume conductor with a purely Ohmic response over a frequency range of interest between 1-3,000 Hz (capacitive effects of the extra-cellular medium are negligible). Under steady-state conditions, the electric potential  $V_s$  generated by a point current source  $I_s$  flowing through an isotropic volume conductor with electrical conductivity  $\sigma$  is given by

$$V_s = \frac{I_s}{4\pi\sigma \cdot r}, \quad (1)$$

where  $r$  the radial distance from the point source.<sup>2</sup>

Cardiomyocyte cultures grow in confluent clusters with ion channels (current sources) spread out across their surfaces. We next approximate the cell clusters as a homogeneous distribution of current sources with current density  $j_0$  distributed across the surface area of a planar 2d disk of radius  $R_0$  as shown by Diagram 1. The contribution of source current,  $dI_s$ , at disc radius  $a$  is given by  $dI_s = j_0 \cdot 2\pi a \cdot da$ . The resultant field at point  $P$  is the linear superposition of point sources<sup>3</sup> and is given by

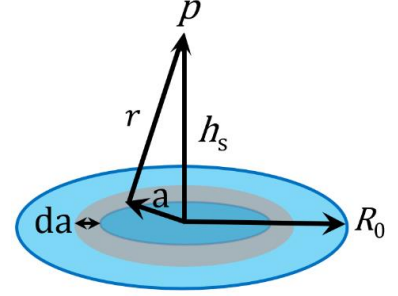

**Diagram 1.** 2D model of a planar current source in an isotropic volume conductor.

$$V^{theory} = 2 \cdot \int_0^{R_0} \frac{dI_s}{4\pi\sigma \cdot r} = \int_0^{R_0} \frac{j_0 2\pi a \cdot da}{4\pi\sigma \sqrt{h_s^2 + a^2}} = \frac{j_0}{\sigma} \left( \sqrt{h_s^2 + R_0^2} - |h_s| \right) + V_0, \quad (2)$$

where  $h_s$  is the height from the center of the disk. The extra-cellular voltage is multiplied by a factor of two because current flow subtends half the solid angle for a planar 2D cell culture. The constant  $V_0$  term is added to account for a voltage drop across the recording electrode interface due to finite impedance, as well as any electrochemical voltage offsets due to grounding the liquid. The cell culture media conductivity  $\sigma$  has a value of  $1.7 \text{ S} \cdot \text{m}^{-1}$  at  $37 \text{ }^\circ\text{C}$ .<sup>4</sup> To account for the uncertainty in  $V_0$ , we take the derivative of Eq.2 with respect to  $h_s$  and arrive at the following expression for the current density

$$j_0 = \sigma \left( \frac{dV}{dh_s} \right) \cdot \left( h_s / \sqrt{h_s^2 + R_0^2} - 1 \right)^{-1}. \quad (3)$$

Note that  $j_0$  depends only the slope ( $dV/dh_s$ ), determined by the fit to experimental data, and distance  $h_s$  for a given culture size set by  $R_0$ . This value is independent of the magnitude of the voltage signal, which can vary significantly based on the quality of the recording electrode.<sup>5</sup>

Figure S5a,b shows the experimentally measured extra-cellular field potential vs. time for various surface heights  $h_s$  from the recording surface of a MEA. Figure S5c shows  $V^{theory}$  as a function of height  $h_s$  from the cell-culture surface, for  $R_0 = 150 \text{ } \mu\text{m}$  and  $j_0 = 1.7 \text{ A/m}^2$ . The red circles and black diamonds, shown in Figure S5d, indicate experimentally measured maximum voltage amplitudes (extracted from Figure S5a,b) measured at 6 DIV ( $V_6^{expt}$ ) and 18 DIV ( $V_{18}^{expt}$ ). The dotted lines are theoretical fits  $V_6^{theory}$  and  $V_{18}^{theory}$  to the experimental data using Eq.2. A two-parameter fit was used to determine  $j_0$  and  $V_0$  for a fixed excitable culture area set by  $R_0$ . The excitable area was determined by spatial distribution of synchronized spiking activity measured by the MEA. Cardiomyocyte activation travels as a wave of electrical activity which propagates from cell-to-cell with an average velocity of  $\approx 0.3 \text{ m} \cdot \text{s}^{-1}$ .<sup>6-8</sup> Voltage signals detected at a given electrode on the MEA are the superposition of all synchronized extra-cellular field

potentials. For a fixed reference point, extra-cellular field potential signals are additive over a maximum spatial window of  $\approx 300 \mu\text{m}$  assuming a depolarization time of  $\approx 0.5 \text{ ms}$ , therefore we used an  $R_0 = 150 \mu\text{m}$ . We find  $j_0 = 1.7 \text{ A}\cdot\text{m}^{-2}$  and  $2.4 \text{ A}\cdot\text{m}^{-2}$  for the 6 and 18 DIV respectively. These results are consistent with whole-cell patch-clamp measurements that give current densities of around  $\approx 1\text{-}3 \text{ A}\cdot\text{m}^{-2}$  (The magnitude of whole cell transmembrane currents span the range  $10^{-9} \text{ A}$  to  $10^{-8} \text{ A}$ ,<sup>9-12</sup> which flow across an area of  $\approx 4\cdot 10^{-9} \text{ m}^2$ .<sup>6,12,13</sup>).

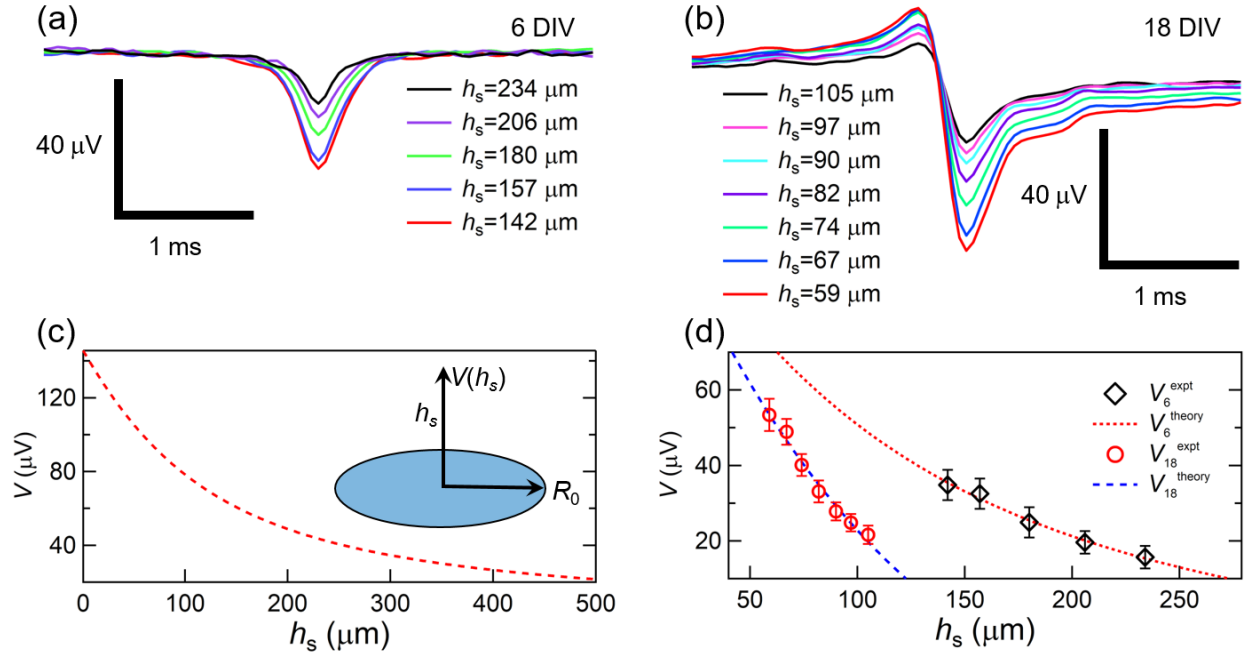

**Figure S5.** Distance dependence of extra-cellular field potentials. (a-b) Experimental non-contact measurements of extra-cellular field potentials from cardiomyocyte cultures at 6 *days in vitro* (DIV) and 18 DIV for various separation heights from the surface of a multi-electrode array. The voltage vs. time plots are the spike triggered average waveforms. (c) Theoretically modeled extra-cellular voltage as a function a distance  $h_s$  from the cell surface. (d) Experimentally measured extra-cellular peak voltage amplitude as a function of distance for two representative cardiomyocyte cultures at 6 DIV ( $V_6^{\text{expt}}$ , black diamonds) and 18 DIV ( $V_{18}^{\text{expt}}$ , red circles). The dashed lines are theoretical fits to the data.

The parameters of our model-dependent results assume homogenous spatial distribution of the cells, which is a reasonable approximation for the contiguous arrangements of cardiomyocytes whose temporal activation is synchronized via gap-junctions.<sup>6</sup> Incorporating cell patterning techniques would help to define more precise spatial geometries of varying degrees of complexity, ranging from sculpting the shape of single cells<sup>14</sup> to templating the geometry of large populations that direct information flow through out interconnected networks.<sup>15-17</sup> Lastly, combining these techniques with high-channel count MEAs<sup>18-20</sup> would enable the development of more precise

computational models used to describe extra-cellular fields generated by inhomogeneous spatial configurations.

- 1 C. Gold, D. A. Henze, C. Koch and G. Buzsáki, *J Neurophysiol*, 2006, **95**, 3113–3128.
- 2 P. L. Nunez and R. Srinivasan, *Electric Fields of the Brain: The neurophysics of EEG*, 2009.
- 3 J. D. Jackson, *Classical Electrodynamics*, Third Edit., 1998.
- 4 A. P. Mazzoleni, B. F. Siskin and R. L. Kahler, *Bioelectromagnetics*, 1986, **7**, 95–99.
- 5 S. Suner, M. R. Fellows, C. Vargas-Irwin, G. K. Nakata and J. P. Donoghue, *IEEE Trans. Neural Syst. Rehabil. Eng.*, 2005, **13**, 524–541.
- 6 M. S. Spach, J. F. Heidlage, P. C. Dolber and R. C. Barr, *Circ. Res.*, 2000, **86**, 302–311.
- 7 A. Natarajan, M. Stancescu, V. Dhir, C. Armstrong, F. Sommerhage, J. J. Hickman and P. Molnar, *Biomaterials*, 2011, **32**, 4267–4274.
- 8 G. Meiry, Y. Reisner, Y. Feld, S. Goldberg, M. Rosen, N. Ziv and O. Binah, *J. Cardiovasc. Electrophysiol.*, 2001, **12**, 1269–1277.
- 9 S. Fredj, K. J. Sampson, H. Liu and R. S. Kass, *Br. J. Pharmacol.*, 2006, **148**, 16–24.
- 10 M. P. Davies, R. H. An, P. Doevendans, S. Kubalak, K. R. Chien and R. S. Kass, *Circ Res*, 1996, **78**, 15–25.
- 11 M. Mille, X. Koenig, E. Zebedin, P. Uhrin, R. Cervenka, H. Todt and K. Hilber, *Pflugers Arch. Eur. J. Physiol.*, 2009, **457**, 1023–1033.
- 12 L. Formigli, F. Francini, S. Nistri, M. Margheri, G. Luciani, F. Naro, J. D. Silvertown, S. Z. Orlandini, E. Meacci and D. Bani, *J. Mol. Cell. Cardiol.*, 2009, **47**, 335–345.
- 13 M. A. Crackower, G. Y. Oudit, I. Koziaradzki, R. Sarao, H. Sun, T. Sasaki, E. Hirsch, A. Suzuki, T. Shioi, J. Irie-Sasaki, R. Sah, H. Y. M. Cheng, V. O. Rybin, G. Lembo, L. Fratta, A. J. Oliveira-dos-Santos, J. L. Benovic, C. R. Kahn, S. Izumo, S. F. Steinberg, M. P. Wymann, P. H. Backx and J. M. Penninger, *Cell*, 2002, **110**, 737–749.
- 14 F. Patolsky, B. P. Timko, G. Yu, Y. Fang, A. B. Greytak, G. Zheng and C. M. Lieber, *Science*, 2006, **313**, 1100–1104.
- 15 B. C. Wheeler and G. J. Brewer, *Proc. IEEE*, 2010, **98**, 398–406.
- 16 S. Dauth, B. M. Maoz, S. P. Sheehy, M. A. Hemphill, T. Murty, M. K. Macedonia, A. M. Greer, B. Budnik and K. K. Parker, *J. Neurophysiol.*, 2017, **117**, 1320–1341.
- 17 O. Feinerman, A. Rotem and E. Moses, *Nat. Phys.*, 2008, **4**, 967–973.

- 18 D. J. Bakkum, U. Frey, M. Radivojevic, T. L. Russell, J. Müller, M. Fiscella, H. Takahashi and A. Hierlemann, *Nat. Commun.*, 2013, **4**, 2181.
- 19 J. Müller, M. Ballini, P. Livi, Y. Chen, M. Radivojevic, A. Shadmani, V. Viswam, I. L. Jones, M. Fiscella, R. Diggelmann, A. Stettler, U. Frey, D. J. Bakkum and A. Hierlemann, *Lab Chip*, 2015, **15**, 2767–2780.
- 20 D. Jäckel, D. J. Bakkum, T. L. Russell, J. Müller, M. Radivojevic, U. Frey, F. Franke and A. Hierlemann, *Sci. Rep.*, 2017, **7**, 978.
